# Supplementary material for: Immune Phenotypic Characterization of a TRAIL-Knockout Mouse
Source: MDPI journal article supplement (doi:10.3390/cancers15051475), 2023-02-25
Supplement: s1 [file s1]

**Supplementary Figure 1 Stoyanova et al.**

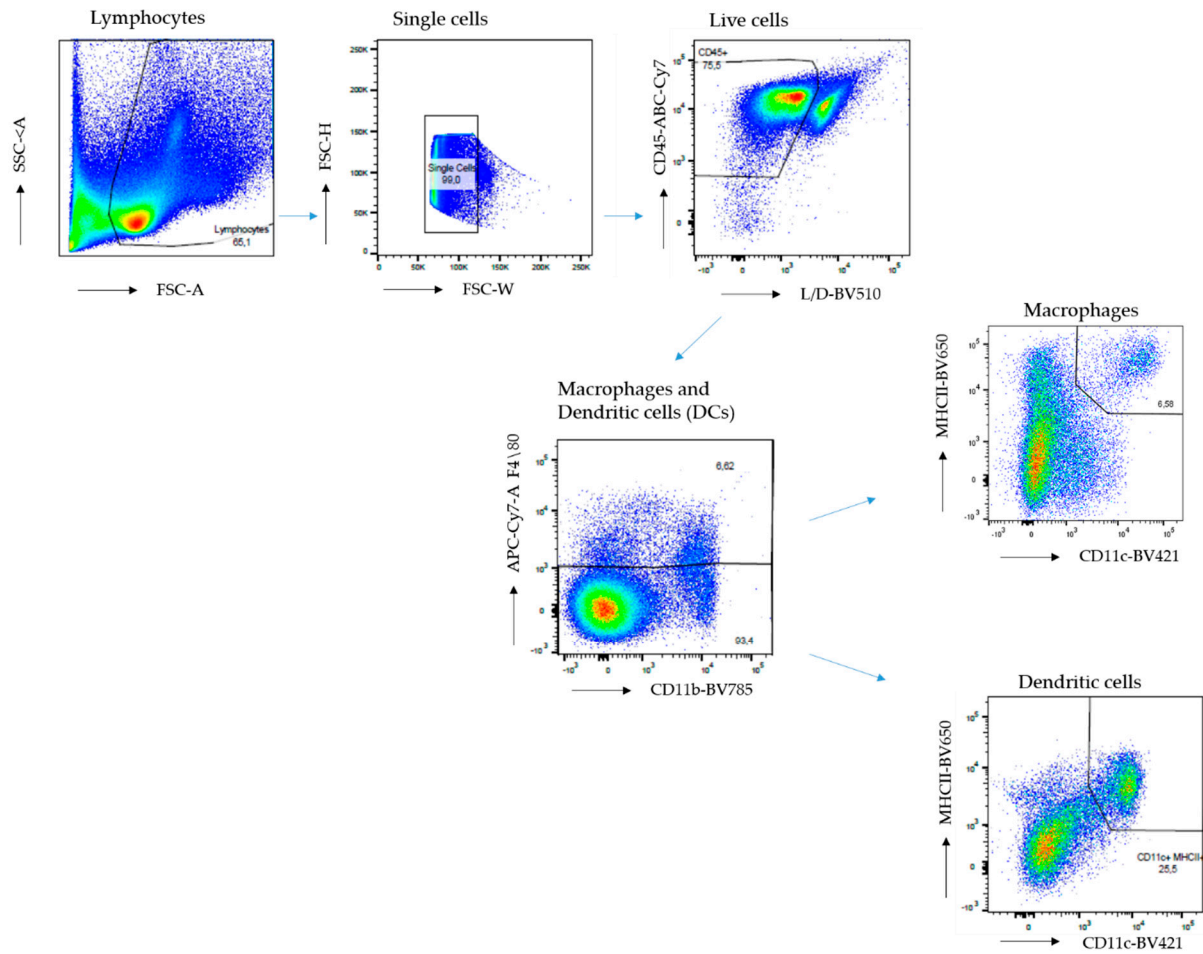

**Gating strategy for identifying macrophages and dendritic cells.** Lymphocytes were selected from a forward scatter area vs side scatter area dot plot, and single cells were subsequently selected in a forward scatter-area vs forward scatter height dot plot. Live CD45<sup>+</sup> cells were identified and divided into DCs and macrophages.

**Supplementary Figure 2 Stoyanova et al.**

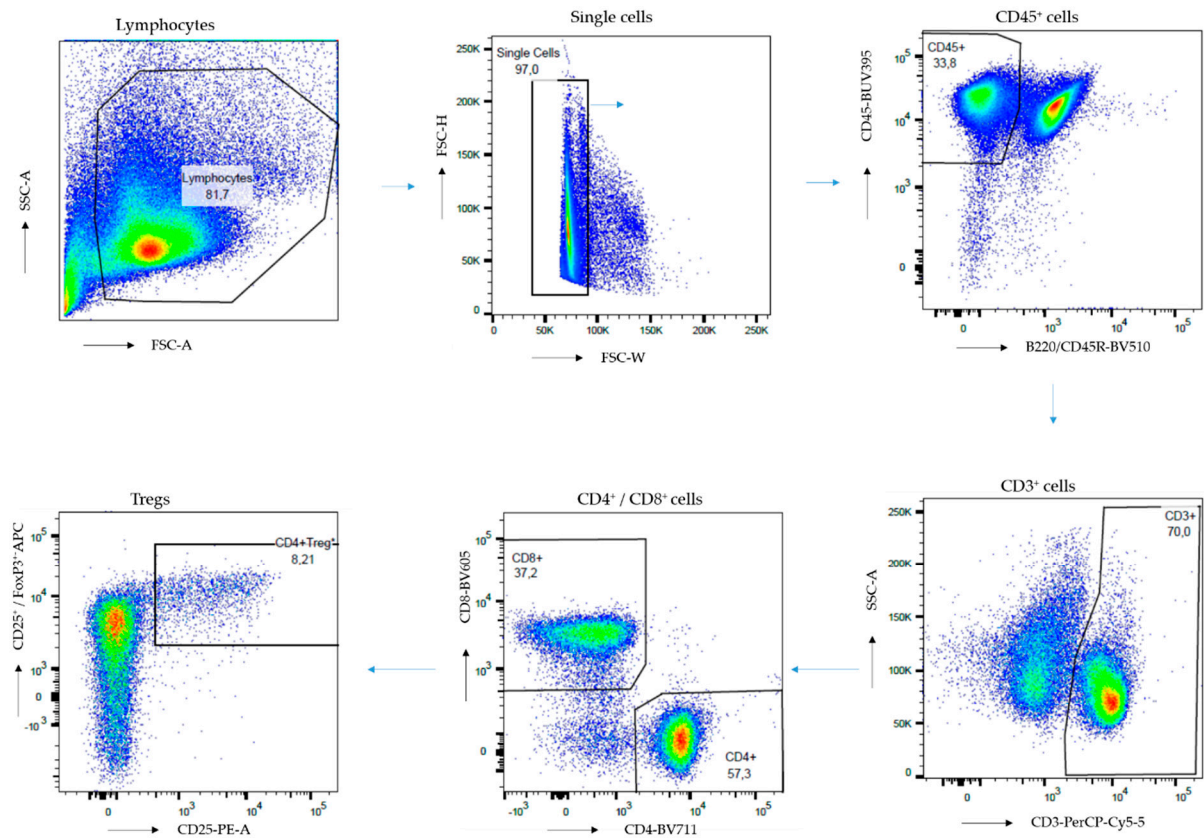

**Gating strategy for identifying main lymphocyte subpopulations.** Lymphocytes were selected from a forward scatter area vs side scatter area dot plot, and single cells were subsequently selected in a forward scatter-area vs forward scatter height dot plot. Live CD45<sup>+</sup> cells were subdivided from the B220-expressing B-lymphocytes. CD3<sup>+</sup>, following CD4<sup>+</sup> and CD8<sup>+</sup> cells were identified via co-staining with BUV395, BV711 and BV605 resp. Tregs were defined as CD25<sup>+</sup> FoxP3<sup>+</sup> cells.

Supplementary Figure 3 Stoyanova et al.

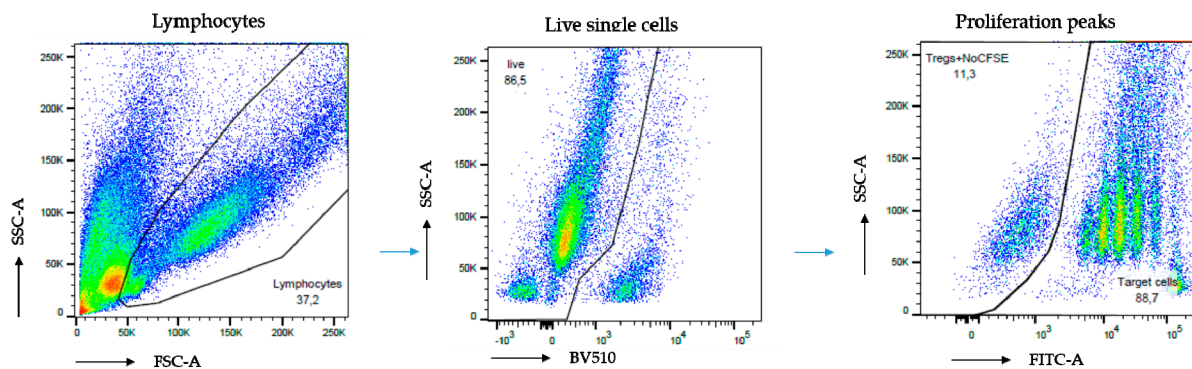

**Gating strategy for CFSE-based proliferation of CD4<sup>+</sup> T cells.** Lymphocytes were selected from a forward scatter area vs side scatter area dot plot, and single cells were subsequently selected in a forward scatter-area vs forward scatter height dot plot. Live CD4<sup>+</sup> cells were identified via staining with BV510. Proliferation peaks of Tregs were identified via CFSE-staining.
